# Supplementary material for: Data from the US and UK cystic fibrosis registries support disease modification by CFTR modulation with ivacaftor
Source: PubMed Central journal article supplement — Thorax. 2018 May 10;73(8):731–40. doi: 10.1136/thoraxjnl-2017-210394 (PMC6204955; doi:10.1136/thoraxjnl-2017-210394), 2018-05-10
Supplement: thoraxjnl-2017-210394supp001.pdf [file thoraxjnl-2017-210394supp001.pdf]

## SUPPLEMENTARY FILE

**Table S1.** Stratified pulmonary exacerbations data for the 2014 UK ivacaftor and comparator safety cohorts

| Strata             | Ivacaftor safety cohort |         | Comparator safety cohort |         | RR   | 95% CI for RR/<br>Fisher's exact<br>p value <sup>a</sup> |
|--------------------|-------------------------|---------|--------------------------|---------|------|----------------------------------------------------------|
|                    | n                       | Risk, % | n                        | Risk, % |      |                                                          |
| Age, y             |                         |         |                          |         |      |                                                          |
| 0 to <6            | 1                       | 12.5    | 18                       | 45.0    | 0.28 | p=0.12                                                   |
| ≥6 to <12          | 16                      | 22.2    | 129                      | 39.7    | 0.56 | 0.36–0.88                                                |
| ≥12 to <18         | 22                      | 29.3    | 250                      | 58.7    | 0.50 | 0.35–0.72                                                |
| ≥18                | 101                     | 39.5    | 760                      | 59.5    | 0.66 | 0.56–0.77                                                |
| ppFEV <sub>1</sub> |                         |         |                          |         |      |                                                          |
| <40                | 27                      | 71.1    | 234                      | 88.0    | 0.81 | 0.66–1.00                                                |
| ≥40 to <70         | 45                      | 50.6    | 447                      | 69.2    | 0.73 | 0.59–0.90                                                |
| ≥70                | 64                      | 23.4    | 412                      | 39.3    | 0.59 | 0.47–0.74                                                |

<sup>a</sup>Fisher's exact p values are shown when the expected value is <5 in at least 1 cell of the contingency table.

CI, confidence interval; ppFEV<sub>1</sub>, percent predicted forced expiratory volume in 1 second; RR, relative risk.

**Table S2.** Stratified hospitalisations for pulmonary exacerbations data for the 2014 UK ivacaftor and comparator safety cohorts

| Strata             | Ivacaftor safety cohort |         | Comparator safety cohort |         | RR   | 95% CI for RR/<br>Fisher's exact<br>p value <sup>a</sup> |
|--------------------|-------------------------|---------|--------------------------|---------|------|----------------------------------------------------------|
|                    | n                       | Risk, % | n                        | Risk, % |      |                                                          |
| Age, y             |                         |         |                          |         |      |                                                          |
| 0 to <6            | 1                       | 12.5    | 16                       | 40.0    | 0.31 | p=0.23                                                   |
| ≥6 to <12          | 15                      | 20.8    | 115                      | 35.4    | 0.59 | 0.37–0.95                                                |
| ≥12 to <18         | 19                      | 25.3    | 227                      | 53.3    | 0.48 | 0.32–0.72                                                |
| ≥18                | 72                      | 28.1    | 579                      | 45.3    | 0.62 | 0.51–0.76                                                |
| ppFEV <sub>1</sub> |                         |         |                          |         |      |                                                          |
| <40                | 16                      | 42.1    | 194                      | 72.9    | 0.58 | 0.40–0.85                                                |
| ≥40 to <70         | 37                      | 41.6    | 352                      | 54.5    | 0.76 | 0.59–0.98                                                |
| ≥70                | 50                      | 18.3    | 328                      | 31.3    | 0.58 | 0.44–0.76                                                |

<sup>a</sup>Fisher's exact p values are shown when the expected value is <5 in at least 1 cell of the contingency table.

CI, confidence interval, ppFEV<sub>1</sub>, percent predicted forced expiratory volume in 1 second; RR, relative risk.

**Table S3.** Stratified hospitalisations data for the 2014 US ivacaftor and comparator safety cohorts

| Strata             | Ivacaftor safety cohort |         | Comparator safety cohort |         | RR   | 95% CI for RR/<br>Fisher's exact<br>p value <sup>a</sup> |
|--------------------|-------------------------|---------|--------------------------|---------|------|----------------------------------------------------------|
|                    | n                       | Risk, % | n                        | Risk, % |      |                                                          |
| Age, y             |                         |         |                          |         |      |                                                          |
| 0 to <6            | 2                       | 4.8     | 55                       | 26.8    | 0.18 | 0.05–0.70                                                |
| ≥6 to <12          | 25                      | 11.6    | 338                      | 30.5    | 0.38 | 0.26–0.56                                                |
| ≥12 to <18         | 85                      | 31.7    | 634                      | 49.7    | 0.64 | 0.53–0.77                                                |
| ≥18                | 234                     | 32.0    | 1644                     | 45.6    | 0.70 | 0.63–0.79                                                |
| ppFEV <sub>1</sub> |                         |         |                          |         |      |                                                          |
| <40                | 56                      | 52.8    | 532                      | 73.9    | 0.71 | 0.59–0.86                                                |
| ≥40 to <70         | 121                     | 39.9    | 917                      | 55.9    | 0.71 | 0.62–0.83                                                |
| ≥70                | 165                     | 20.5    | 1135                     | 31.5    | 0.65 | 0.56–0.75                                                |

<sup>a</sup>Fisher's exact p values are shown when the expected value is <5 in at least 1 cell of the contingency table.

CI, confidence interval; ppFEV<sub>1</sub>, percent predicted forced expiratory volume in 1 second; RR, relative risk.

**Table S4.** Stratified pulmonary exacerbations data for the 2014 US ivacaftor and comparator safety cohorts

| Strata             | Ivacaftor safety cohort |         | Comparator safety cohort |         | RR   | 95% CI for RR/<br>Fisher's exact<br>p value <sup>a</sup> |
|--------------------|-------------------------|---------|--------------------------|---------|------|----------------------------------------------------------|
|                    | n                       | Risk, % | n                        | Risk, % |      |                                                          |
| Age, y             |                         |         |                          |         |      |                                                          |
| 0 to <6            | 2                       | 4.8     | 49                       | 23.9    | 0.20 | 0.05–0.79                                                |
| ≥6 to <12          | 20                      | 9.3     | 307                      | 27.7    | 0.34 | 0.22–0.52                                                |
| ≥12 to <18         | 73                      | 27.2    | 606                      | 47.5    | 0.57 | 0.47–0.70                                                |
| ≥18                | 254                     | 34.8    | 1722                     | 47.7    | 0.73 | 0.66–0.81                                                |
| ppFEV <sub>1</sub> |                         |         |                          |         |      |                                                          |
| <40                | 66                      | 62.3    | 574                      | 79.7    | 0.78 | 0.67–0.91                                                |
| ≥40 to <70         | 135                     | 44.6    | 965                      | 58.8    | 0.76 | 0.66–0.86                                                |
| ≥70                | 143                     | 17.7    | 1068                     | 29.7    | 0.60 | 0.51–0.70                                                |

<sup>a</sup>Fisher's exact p values are shown when the expected value is <5 in at least 1 cell of the contingency table.

CI, confidence interval; ppFEV<sub>1</sub>, percent predicted forced expiratory volume in 1 second; RR, relative risk.
